# Supplementary material for: The relationship between habitual water intake and dry eye disease
Source: PubMed Central journal article supplement — Acta Ophthalmol. 2022 Aug 8;101(1):65–73. doi: 10.1111/aos.15227 (PMC10087849; doi:10.1111/aos.15227), 2022-08-08
Supplement: AOS-101-65-s002.pdf [file AOS-101-65-s002.pdf]

**Supplemental Table 2: Prevalence of Women’s Health Study-defined dry eye in age-decade specific quintiles of water intake, stratified by sex**

|                                              | Males (N = 20,377) |                 |                 |                 |                 | Females (N = 31,174) |                 |                 |                 |                 |
|----------------------------------------------|--------------------|-----------------|-----------------|-----------------|-----------------|----------------------|-----------------|-----------------|-----------------|-----------------|
| Quintiles of Water Intake:                   | 1 <sup>st</sup>    | 2 <sup>nd</sup> | 3 <sup>rd</sup> | 4 <sup>th</sup> | 5 <sup>th</sup> | 1 <sup>st</sup>      | 2 <sup>nd</sup> | 3 <sup>rd</sup> | 4 <sup>th</sup> | 5 <sup>th</sup> |
| WHS-defined dry eye, %                       | 4.74               | 4.70            | 5.29            | 5.14            | 5.34            | 11.13                | 10.56           | 11.43           | 12.17           | 13.37           |
| Highly symptomatic dry eye, %                | 0.93               | 0.56            | 1.03            | 0.96            | 0.81            | 1.89                 | 2.26            | 2.53            | 2.87            | 3.07            |
| Clinical diagnosis dry eye, %                | 4.37               | 4.48            | 4.85            | 4.87            | 5.07            | 10.38                | 10.06           | 10.77           | 11.53           | 12.45           |
| <b>Total Water Intake, mL/day, mean (sd)</b> | 1824 (221)         | 2254 (110)      | 2555 (116)      | 2880 (155)      | 3539 (459)      | 1684 (228)           | 2092 (120)      | 2366 (117)      | 2666 (127)      | 3257 (385)      |
| <i>Beverage Water, mL/day, mean (sd)</i>     | 1018 (221)         | 1308 (192)      | 1521 (210)      | 1762 (246)      | 2280 (473)      | 955 (215)            | 1252 (178)      | 1460 (190)      | 1701 (210)      | 2199 (398)      |
| <i>Food Water, mL/day, mean (sd)</i>         | 567 (137)          | 670 (149)       | 733 (162)       | 793 (180)       | 894 (239)       | 532 (130)            | 619 (135)       | 672 (148)       | 720 (160)       | 798 (205)       |
| <i>Metabolic Water, mL/day, mean (sd)</i>    | 239 (55)           | 275 (59)        | 301 (66)        | 325 (73)        | 365 (88)        | 197 (47)             | 221 (50)        | 233 (54)        | 245 (58)        | 260 (65)        |
| Age, years, mean (sd)                        | 52.2 (12.5)        | 52.2 (12.5)     | 52.2 (12.4)     | 52.2 (12.4)     | 52.0 (12.3)     | 50.4 (12.5)          | 50.5 (12.4)     | 50.6 (12.3)     | 50.7 (12.4)     | 50.7 (12.3)     |
| Height, cm, mean (sd)                        | 181.3 (7.0)        | 181.9 (7.0)     | 182.5 (7.0)     | 182.5 (7.0)     | 183.2 (7.0)     | 168.3 (6.5)          | 168.9 (6.5)     | 169.1 (6.4)     | 169.3 (6.5)     | 169.6 (6.5)     |
| Weight, kg, mean (sd)                        | 86.5 (12.9)        | 86.6 (12.6)     | 87.1 (12.5)     | 87.5 (13.0)     | 89.1 (13.3)     | 73.1 (13.7)          | 73.2 (13.6)     | 73.2 (12.8)     | 74.3 (13.6)     | 74.8 (13.9)     |
| Body-mass index, mean (sd)                   | 26.3 (3.6)         | 26.2 (3.5)      | 26.1 (3.5)      | 26.3 (3.6)      | 26.6 (3.6)      | 25.6 (4.8)           | 25.7 (4.6)      | 25.8 (4.4)      | 25.9 (4.5)      | 26.1 (4.7)      |
| Energy intake, Kcal/day, mean (sd)           | 1940 (443)         | 2238 (475)      | 2446 (537)      | 2634 (589)      | 2960 (714)      | 1612 (379)           | 1811 (405)      | 1908 (437)      | 2005 (470)      | 2127 (527)      |

Age-decade specific quintiles of water intake and prevalence of Women’s Health Study-defined dry eye. Data are mean (standard deviation), or percentage.

WHS: Women’s Health Study; sd: standard deviation.
