# Supplementary material for: The relationship between habitual water intake and dry eye disease
Source: PubMed Central journal article supplement — Acta Ophthalmol. 2022 Aug 8;101(1):65–73. doi: 10.1111/aos.15227 (PMC10087849; doi:10.1111/aos.15227), 2022-08-08
Supplement: AOS-101-65-s003.pdf [file AOS-101-65-s003.pdf]

## Supplemental Table 1A

| ATC-Codes | Name                                         |
|-----------|----------------------------------------------|
| A02BC     | Proton pump inhibitors                       |
| A03A      | Drugs for functional GI disorders            |
| A06AC01   | Ispaghula (psylla seeds)                     |
| B01AC08   | Carbasalate calcium                          |
| C03AA     | Thiazides, plain                             |
| C07AA     | Beta blocking agents, non-selective          |
| G03AA09   | Desogestrel and ethinylestradiol             |
| G04BD     | Drugs for urinary frequency and incontinence |
| N02A      | Opioids                                      |
| N03AX     | Other antiepileptics                         |
| N05CF     | Benzodiazepine-related drugs                 |
| N06AA     | Non-selective monoamine reuptake inhibitors  |
| N06AB     | Selective serotonin reuptake inhibitors      |
| N06BA     | Centrally acting sympathomimetics            |
| S01E      | Antiglaucoma preparations and miotics        |

Overview of the medications and medication groups associated dry eye and dry mouth corrected for in logistic regression Model 3. ATC: Anatomical Therapeutic Chemical.

## Supplemental Table 1B

| Comorbidities                                  |                                                                                                                                                                        |
|------------------------------------------------|------------------------------------------------------------------------------------------------------------------------------------------------------------------------|
| <u>Ocular traits and conditions</u>            | Contact lens wear, keratoconus, macular degeneration, glaucoma/ocular hypertension, eye surgery (any), allergic conjunctivitis, Bell's palsy, laser refractive surgery |
| <u>Autoimmune conditions</u>                   | Rheumatoid arthritis, systemic lupus erythematosus, Sjogren's disease, sarcoidosis                                                                                     |
| <u>Musculoskeletal and pain conditions</u>     | Fibromyalgia, osteoarthritis, spinal disc herniation, repetitive strain injury, chronic back pain, osteoporosis, carpal tunnel syndrome                                |
| <u>Gastrointestinal and renal conditions</u>   | Gastric ulcer, Crohn's disease, liver cirrhosis, chronic cystitis, urinary incontinence, irritable bowel syndrome                                                      |
| <u>Neurological and psychiatric conditions</u> | Spasticity, migraine, chronic fatigue syndrome, depression, burnout, autism                                                                                            |
| <u>Dermatological and atopic conditions</u>    | Asthma, acne, psoriasis, eczema, rosacea, hay fever, allergy (any), sinusitis, lichen planus                                                                           |
| <u>Endocrine conditions</u>                    | Diabetes mellitus, thyroid disease (any), Graves' disease                                                                                                              |
| <u>Cardiovascular and other conditions</u>     | Hypertension, atherosclerosis, cardiac arrhythmia, anemia, obstructive sleep apnea                                                                                     |

Overview of the comorbidities of dry eye corrected for in logistic regression Model 3.
